# Supplementary material
Source: Springer Nature journal article supplement (https://www.springermedizin.de/resource/supplementary/12885_2007_1185_MOESM4_ESM.pdf/9471346)

#### 4-A

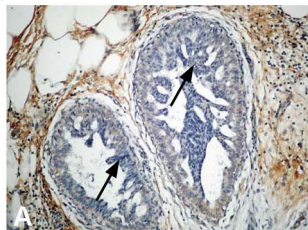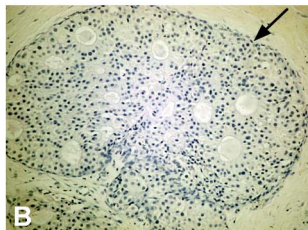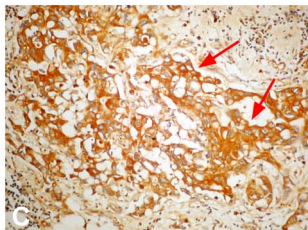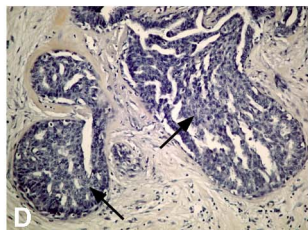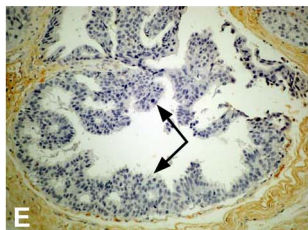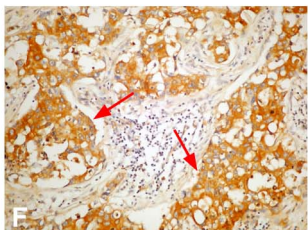

#### 4-B

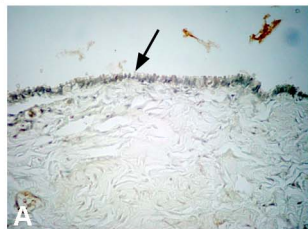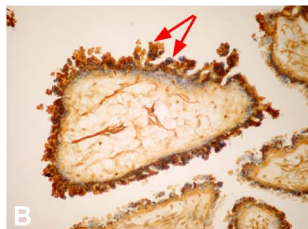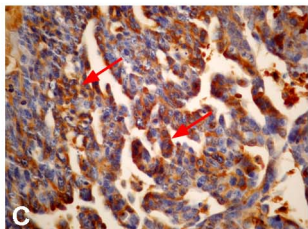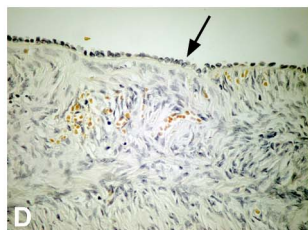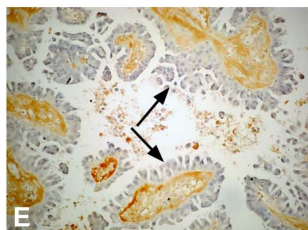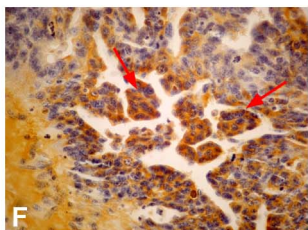

Supplement: MOESM4 [file 9471346]
